# Supplementary material for: Whole Genome Sequence, Variant Discovery and Annotation in Mapuche-Huilliche Native South Americans
Source: PubMed Central journal article supplement (PMC6376018; doi:10.1038/s41598-019-39391-z), 2019-02-14
Supplement: 41598_2019_39391_MOESM1_ESM.pdf [file 41598_2019_39391_MOESM1_ESM.pdf]

## Supplemental Information

### Whole Genome Sequence, Variant Discovery and Annotation in Mapuche-Huilliche Native South Americans

Elena A. Vidal<sup>1,2,15,\*</sup>, Tomás C. Moyano<sup>1,2,\*</sup>, Bernabé I. Bustos<sup>1,3,\*</sup>, Eduardo Pérez-Palma<sup>1,3,\*</sup>, Carol Moraga<sup>1,2,\*</sup>, Eleodoro Riveras<sup>1,4\*</sup>, Alejandro Montecinos<sup>1,2</sup>, Lorena Azócar<sup>1,4</sup>, Daniela C. Soto<sup>1,2</sup>, Mabel Vidal<sup>1,2</sup>, Alex Di Genova<sup>1,5</sup>, Klaus Puschel<sup>6</sup>, Peter Nürnberg<sup>7</sup>, Stephan Buch<sup>8</sup>, Jochen Hampe<sup>8</sup>, Miguel L. Allende<sup>1,9</sup>, Verónica Cambiazo<sup>1,10</sup>, Mauricio González<sup>1,10</sup>, Christian Hodar<sup>1,10</sup>, Martín Montecino<sup>1,3</sup>, Claudia Muñoz-Espinoza<sup>1,11</sup>, Ariel Orellana<sup>1,11</sup>, Angélica Reyes-Jara<sup>1,11</sup>, Dante Travisany<sup>1,5</sup>, Paula Vizoso<sup>1,11</sup>, Mauricio Moraga<sup>12,13</sup>, Susana Eyheramendy<sup>14</sup>, Alejandro Maass<sup>1,6</sup>, Giancarlo V. De Ferrari<sup>1,3,\*\*</sup>, Juan Francisco Miquel<sup>1,4,\*\*</sup>, Rodrigo A. Gutiérrez<sup>1,2,\*\*</sup>

Correspondence should be addressed to R.A.G. ([rgutierrez@bio.puc.cl](mailto:rgutierrez@bio.puc.cl)) or J.F.M. ([jfmiquel@med.puc.cl](mailto:jfmiquel@med.puc.cl)) or G.V.D. ([gdeferrari@unab.cl](mailto:gdeferrari@unab.cl)).

**Figure S1. Geographic context of HUI samples used in this study.** Map of South America depicting the location of Ranco Lake from where HUI samples were obtained. This figure using Adobe Illustrator® CS5 (<http://www.adobe.com>), based on the vector map “South America with Countries - Single Color”, obtained from <https://freevectormaps.com/>.

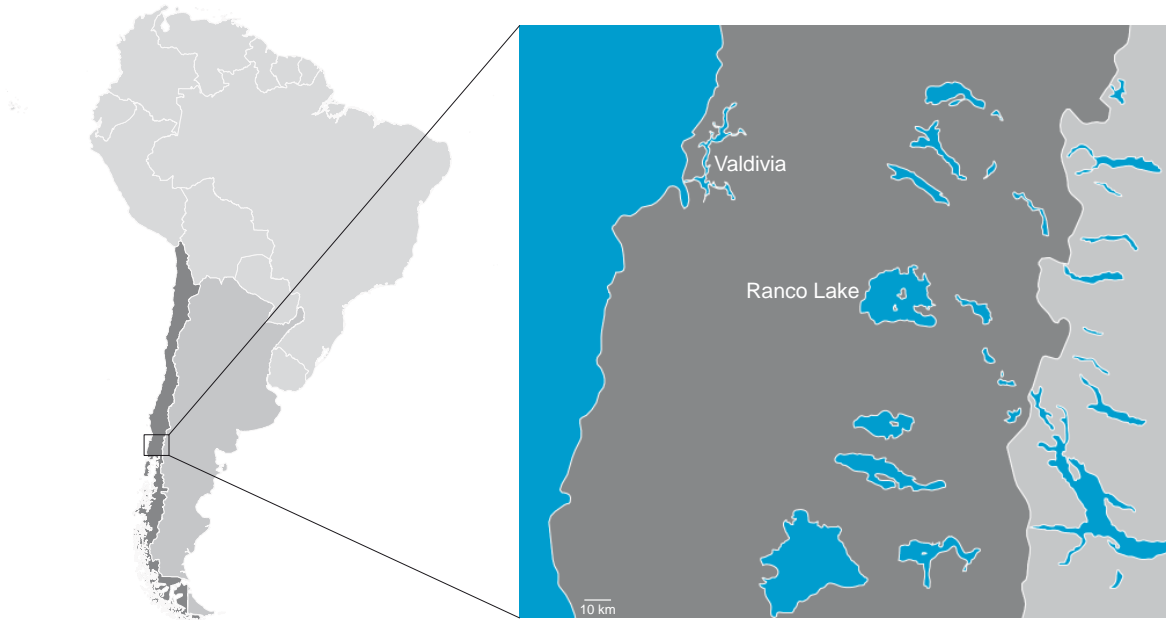

**Figure S2. Novel SNVs in Mapuche-Huilliche genomes.** (A) Allele frequencies for novel SNVs discovered in sequenced genomes. (B) Novel SNVs according to genome location.

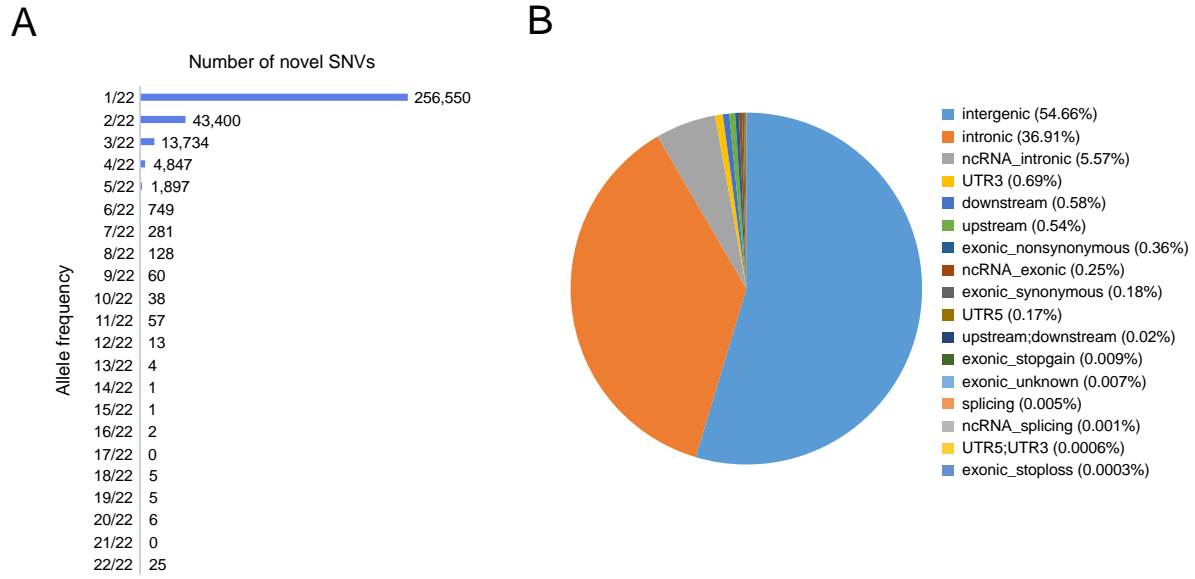

**Figure S3. Global map of CNVs in sequenced individuals.** (A) Location of 290 CNVs gains (blue) and 390 CNVs losses (red). CNV sites are arranged according to sequenced individuals in tracks. Light or dark colors indicate known or novel variants, respectively. Novel events conserved in all individual analyzed are shown as green triangles. Tracks: 1 (G000011194); 2 (G000011195); 3 (G000011196); 4 (G000011198); 5 (G000011200); 6 (G000011201); 7 (G000011215); and 8 (G000020403); (B) Genomic context and potential functional impact of CNVs shared by all individuals. A thick blue and red bar on top of each gene indicates observed gains and losses, respectively.

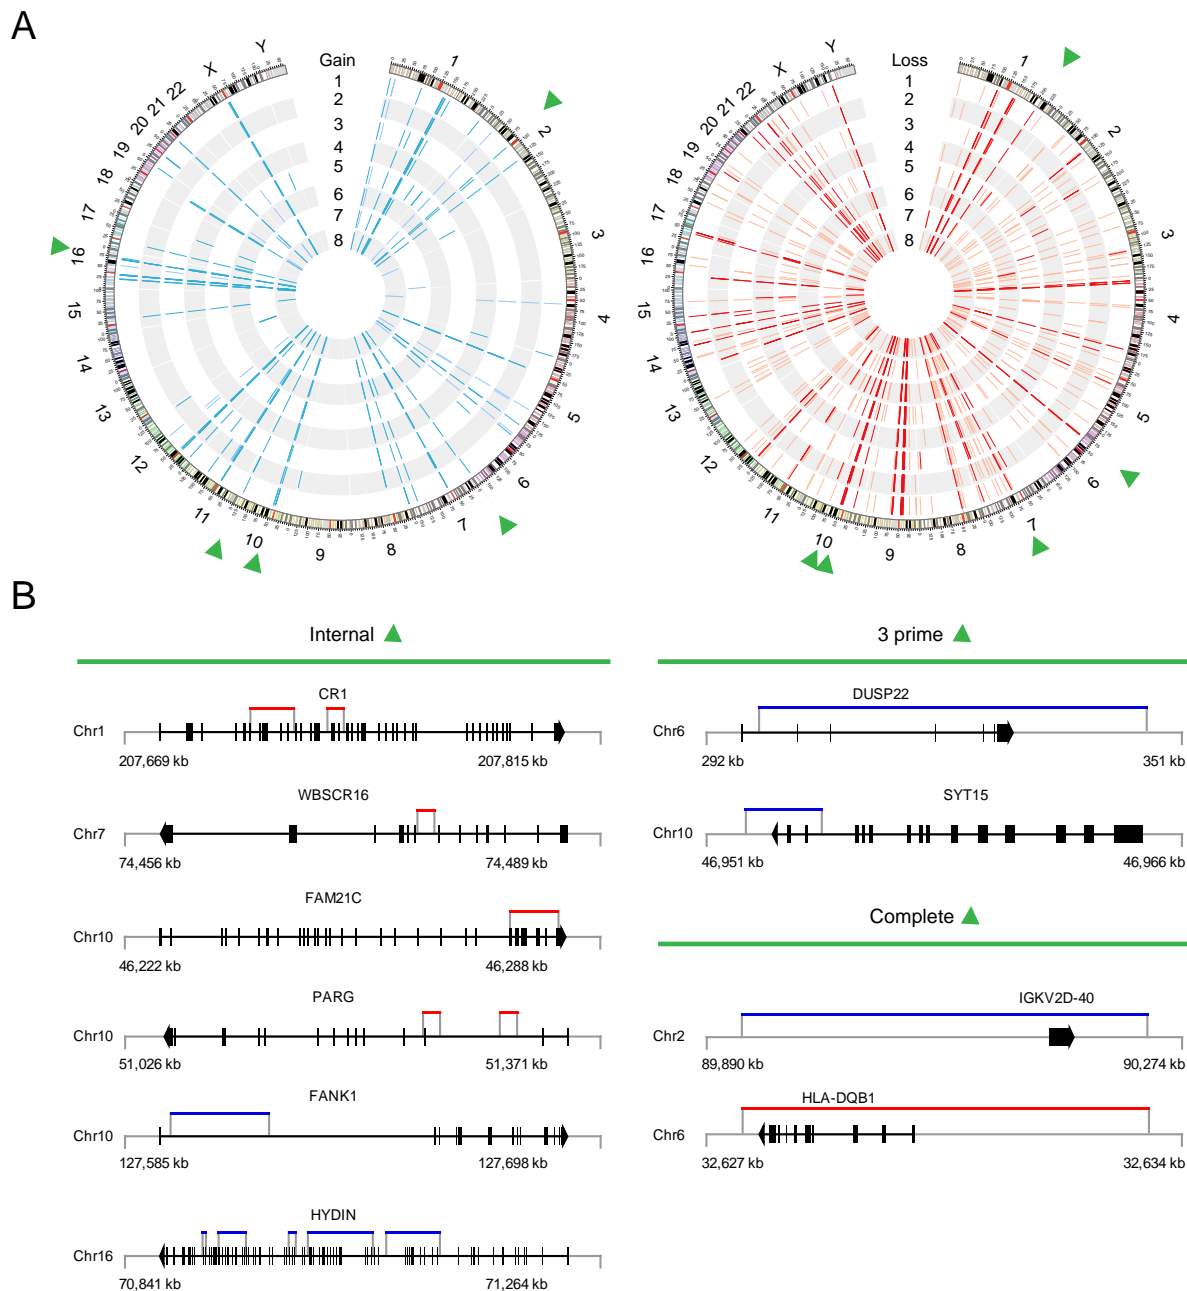

**Figure S4. ADMIXTURE analysis of HUI ancestry.** (A) Cross-validation (CV) errors are shown for K=1 to K=15 models of ADMIXTURE; (B) Zoom area of (A) with focus on K=5 to K=15 models. Minimum CV error is observed at K=10.

A

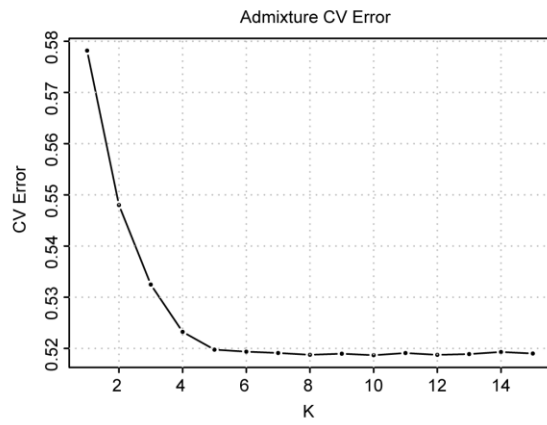

B

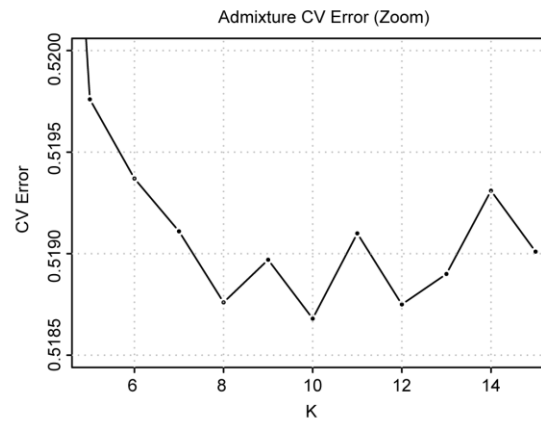

**Figure S5. mtDNA haplogroup lineages of Mapuche-Huilliche individuals.** (A) Network for the C1 haplogroup. The arrow shows the C1 nodal, characterized by revised Cambridge Reference Sequence (rCRS) differences at 16223, 16298, 16325, 16327, 73, 249d, 263, 290dd, 315+C, 489, 522dd. We also show the southern South American C1b13 haplogroup, characterized by the 258 polymorphism plus C1b core. (B) Network for the mitochondrial D haplogroup. The arrow shows the D1 nodal, characterized by rCRS differences at 16223, 16325, 16362, 73, 263, 315+C, 489. About the D1 haplogroup, the southern South American haplogroup D1g is represented, characterized by the mutation 16187T plus D1 core, and the D4h3a haplogroup, characterized by 16342 and 16241 polymorphisms. HUI individuals from the present study (Huapi-Island) are highlighted in dark blue circles with the respective assembly ID. Haplogroups indicated for each individual were determined from complete mitochondrial sequences.

A

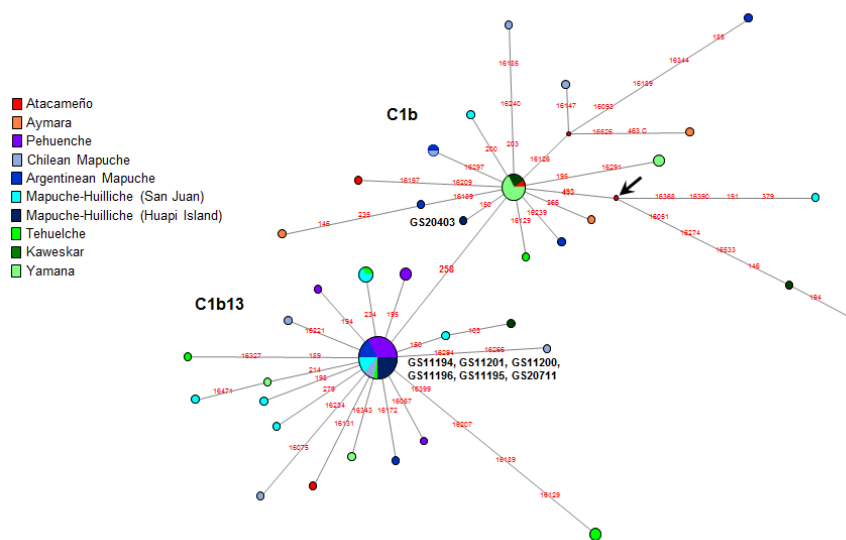

B

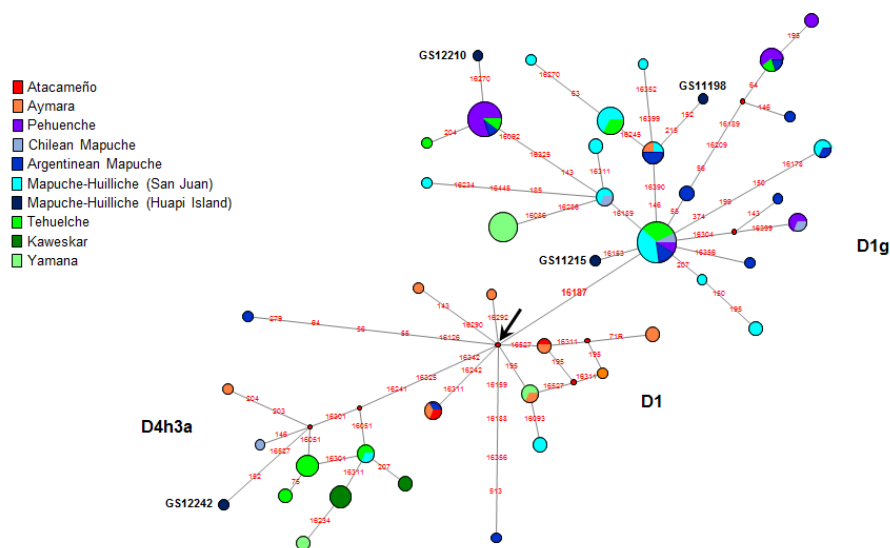

**Table S1. Total variants identified in HUI individuals listed by chromosome.**

| <b>Chr</b> | <b>SNVs</b> | <b>Novel SNVs</b> | <b>MNVs</b> | <b>Novel MNVs</b> | <b>Insertions</b> | <b>Novel insertions</b> | <b>Deletions</b> | <b>Novel deletions</b> |
|------------|-------------|-------------------|-------------|-------------------|-------------------|-------------------------|------------------|------------------------|
| 1          | 445,194     | 30,238            | 18,046      | 9,526             | 34,697            | 7,135                   | 35,957           | 4,355                  |
| 2          | 462,032     | 32,788            | 19,053      | 10,377            | 34,634            | 6,997                   | 35,359           | 4,264                  |
| 3          | 393,966     | 28,174            | 17,287      | 9,587             | 28,805            | 5,536                   | 29,884           | 3,503                  |
| 4          | 422,384     | 28,848            | 17,561      | 9,207             | 29,285            | 5,205                   | 31,284           | 3,257                  |
| 5          | 354,460     | 27,064            | 14,966      | 8,410             | 26,126            | 4,974                   | 26,884           | 3,207                  |
| 6          | 370,596     | 24,192            | 17,430      | 8,580             | 27,368            | 5,217                   | 28,325           | 3,336                  |
| 7          | 338,891     | 22,801            | 15,530      | 8,280             | 25,440            | 5,008                   | 25,845           | 3,046                  |
| 8          | 301,338     | 21,588            | 12,258      | 6,666             | 20,756            | 4,236                   | 21,420           | 2,621                  |
| 9          | 237,998     | 16,520            | 9,719       | 5,150             | 17,436            | 3,517                   | 17,242           | 2,181                  |
| 10         | 289,851     | 17,280            | 11,519      | 5,605             | 21,799            | 4,122                   | 22,931           | 2,651                  |
| 11         | 279,792     | 19,926            | 13,604      | 7,655             | 20,608            | 4,065                   | 21,206           | 2,543                  |
| 12         | 269,146     | 19,103            | 12,360      | 6,706             | 20,936            | 4,072                   | 21,744           | 2,497                  |
| 13         | 212,821     | 14,028            | 8,489       | 4,377             | 15,859            | 2,796                   | 16,282           | 1,590                  |
| 14         | 179,874     | 12,881            | 7,538       | 3,993             | 13,876            | 2,690                   | 14,100           | 1,655                  |
| 15         | 173,696     | 10,567            | 6,897       | 3,286             | 13,434            | 2,636                   | 13,764           | 1,609                  |
| 16         | 180,184     | 10,960            | 7,890       | 3,701             | 13,037            | 2,762                   | 12,828           | 1,577                  |
| 17         | 152,629     | 9,571             | 6,832       | 3,245             | 13,808            | 3,141                   | 13,738           | 1,779                  |
| 18         | 168,802     | 10,195            | 6,324       | 3,144             | 12,140            | 2,138                   | 12,912           | 1,426                  |
| 19         | 130,506     | 7,699             | 7,184       | 3,221             | 12,346            | 2,673                   | 12,245           | 1,766                  |
| 20         | 125,336     | 7,736             | 5,342       | 2,589             | 10,128            | 2,106                   | 9,852            | 1,263                  |
| 21         | 83,605      | 5,078             | 4,147       | 1,985             | 6,664             | 1,166                   | 6,579            | 697                    |
| 22         | 75,040      | 4,086             | 3,193       | 1,419             | 6,420             | 1,381                   | 6,350            | 772                    |
| X          | 196,744     | 21,790            | 11,258      | 7,446             | 16,699            | 4,561                   | 16,546           | 3,090                  |
| Y*         | 2,066       | 242               | 183         | 62                | 160               | 39                      | 109              | 31                     |
| Mt         | 83          | 28                | 5           | 3                 | 1                 | 0                       | 3                | 2                      |
| Total      | 5,847,034   | 403,383           | 254,615     | 134,220           | 442,462           | 88,173                  | 453,389          | 54,718                 |

SNVs: Single Nucleotide Variants; MNVs: Multinucleotide variants; Asterisk indicates information for chromosome Y for one male individual (GS000012210). Mt: Mitochondrial DNA.

**Table S2. Concordance between whole genome HUI sequencing and microarray genotyping.**

| Assembly ID | Genotyped positions |         |         |         |                        | Matching positions |         |         |         |                   | Conc . % |
|-------------|---------------------|---------|---------|---------|------------------------|--------------------|---------|---------|---------|-------------------|----------|
|             | Total               | Hom ref | Het ref | Hom alt | non matching positions | Total              | Hom ref | Het ref | Hom alt | Genotype Mismatch |          |
| GS000011194 | 515,724             | 366,412 | 76,932  | 72,380  | 3,257                  | 512,467            | 364,397 | 75,842  | 70,790  | 1,438             | 99.72    |
| GS000011195 | 515,783             | 367,557 | 75,272  | 72,954  | 3,157                  | 512,626            | 365,533 | 74,220  | 71,397  | 1,476             | 99.71    |
| GS000011196 | 515,881             | 367,599 | 75,968  | 72,314  | 3,436                  | 512,445            | 365,430 | 74,829  | 70,612  | 1,574             | 99.69    |
| GS000011198 | 515,913             | 371,069 | 69,743  | 75,101  | 3,475                  | 512,438            | 368,888 | 68,663  | 73,339  | 1,548             | 99.70    |
| GS000011200 | 515,969             | 367,786 | 75,012  | 73,171  | 3,601                  | 512,368            | 365,555 | 73,836  | 71,469  | 1,508             | 99.71    |
| GS000011201 | 516,102             | 365,485 | 80,344  | 70,273  | 3,956                  | 512,146            | 363,091 | 79,006  | 68,460  | 1,589             | 99.69    |
| GS000011215 | 516,165             | 368,012 | 75,294  | 72,859  | 2,696                  | 513,469            | 366,284 | 74,373  | 71,498  | 1,314             | 99.74    |
| GS000020403 | 515,900             | 366,736 | 77,729  | 71,435  | 3,567                  | 512,333            | 364,512 | 76,544  | 69,690  | 1,587             | 99.69    |
| GS000020711 | 516,112             | 367,522 | 76,233  | 72,357  | 3,117                  | 512,995            | 365,689 | 75,088  | 70,519  | 1,699             | 99.67    |
| Average     |                     |         |         |         |                        |                    |         |         |         |                   | 99.70    |

As a validation assay, Mapuche-Huilliche samples were genotyped using the Illumina Infinium® Human Core Exome BeadChip. The number of positions that were genotyped for each individual and the matching positions that were sequenced by Complete Genomics are shown. Hom ref: both alleles are equal to the reference (NCBI GRCh build 37); Het ref: one of the alleles differ from the reference; Hom alt: both alleles are different and differ from the reference; Genotype Mismatch: number of variants that differ between both technologies. Conc. %: percentage of concordance between sequenced and genotyped data.



**Table S3. Transition and Transversion mutation ratios in HUI genomes.**

| <b>SNV</b> | <b>Count</b> |
|------------|--------------|
| AC         | 483,880      |
| AG         | 1,984,115    |
| AT         | 399,387      |
| CG         | 510,165      |
| CT         | 1,985,454    |
| GT         | 484,019      |
| Ts         | 3,969,569    |
| Tv         | 1,877,451    |
| Ts/Tv      | 2.114        |

Genome-wide transitions (AG-CT) and transversions (AC-GT-AT-CG) ratios were calculated with VCFtools for a total number of 5,847,020 SNVs as the union of all 11 SNVs in HUI individual genomes.

**Table S4. Identity by descent (IBD) analysis in HUI individuals.**

| <b>ID1</b>  | <b>ID2</b>  | <b>PI_HAT</b> |
|-------------|-------------|---------------|
| GS000011194 | GS000011201 | 0.2547        |
| GS000011196 | GS000012210 | 0.2355        |
| GS000012210 | GS000012242 | 0.1549        |
| GS000011195 | GS000011196 | 0.1361        |
| GS000011195 | GS000012210 | 0.13          |
| GS000011196 | GS000012242 | 0.0943        |
| GS000011198 | GS000011200 | 0.0901        |
| GS000011200 | GS000020711 | 0.0782        |
| GS000011195 | GS000012242 | 0.0728        |
| GS000012242 | GS000020403 | 0.0721        |
| GS000011195 | GS000020403 | 0.0691        |
| GS000011194 | GS000011198 | 0.066         |
| GS000011215 | GS000020403 | 0.0604        |
| GS000011195 | GS000011200 | 0.0565        |
| GS000011196 | GS000020403 | 0.0502        |
| GS000011200 | GS000020403 | 0.0472        |
| GS000011201 | GS000020403 | 0.0469        |
| GS000011200 | GS000012242 | 0.0425        |
| GS000012210 | GS000020403 | 0.0417        |
| GS000011194 | GS000012242 | 0.0415        |
| GS000011200 | GS000011215 | 0.0411        |
| GS000012242 | GS000020711 | 0.041         |
| GS000011215 | GS000012242 | 0.0404        |
| GS000011200 | GS000011201 | 0.0366        |
| GS000011215 | GS000012210 | 0.0286        |
| GS000011194 | GS000011200 | 0.0283        |
| GS000011194 | GS000020711 | 0.025         |
| GS000011194 | GS000020403 | 0.0222        |
| GS000012210 | GS000020711 | 0.0198        |
| GS000011195 | GS000011215 | 0.0197        |
| GS000011201 | GS000011215 | 0.019         |
| GS000011200 | GS000012210 | 0.0187        |
| GS000011196 | GS000011215 | 0.0159        |
| GS000020403 | GS000020711 | 0.0153        |
| GS000011196 | GS000020711 | 0.0106        |
| GS000011196 | GS000011200 | 0.0078        |
| GS000011194 | GS000011195 | 0             |
| GS000011194 | GS000011196 | 0             |
| GS000011194 | GS000011215 | 0             |
| GS000011194 | GS000012210 | 0             |
| GS000011195 | GS000011198 | 0             |
| GS000011195 | GS000011201 | 0             |
| GS000011195 | GS000020711 | 0             |
| GS000011196 | GS000011198 | 0             |
| GS000011196 | GS000011201 | 0             |
| GS000011198 | GS000011201 | 0             |
| GS000011198 | GS000011215 | 0             |
| GS000011198 | GS000012210 | 0             |

|             |             |   |
|-------------|-------------|---|
| GS000011198 | GS000012242 | 0 |
| GS000011198 | GS000020403 | 0 |
| GS000011198 | GS000020711 | 0 |
| GS000011201 | GS000012210 | 0 |
| GS000011201 | GS000012242 | 0 |
| GS000011201 | GS000020711 | 0 |
| GS000011215 | GS000020711 | 0 |

---

IBD analysis was performed in PLINK. ID1 and ID2 indicates the pair of individuals analyzed. PI\_HAT corresponds to the proportion of IBD from 0 to 1.

**Table S5. Inbreeding (F) analyses in HUI individuals.**

| <b>ID</b>   | <b>O(HOM)</b> | <b>E(HOM)</b> | <b>N(NM)</b> | <b>F</b> |
|-------------|---------------|---------------|--------------|----------|
| GS000011194 | 278050        | 2.85E+05      | 389701       | -0.06461 |
| GS000011195 | 281054        | 2.85E+05      | 389737       | -0.03617 |
| GS000011196 | 279126        | 2.85E+05      | 389438       | -0.05254 |
| GS000011198 | 288717        | 2.85E+05      | 389369       | 0.03934  |
| GS000011200 | 279704        | 2.85E+05      | 389286       | -0.04611 |
| GS000011201 | 272696        | 2.84E+05      | 388762       | -0.1095  |
| GS000011215 | 280879        | 2.85E+05      | 389993       | -0.03967 |
| GS000012210 | 277432        | 2.83E+05      | 387773       | -0.05641 |
| GS000012242 | 267725        | 2.83E+05      | 387531       | -0.1473  |
| GS000020403 | 274739        | 2.84E+05      | 388477       | -0.08833 |
| GS000020711 | 279290        | 2.84E+05      | 389076       | -0.04848 |

Inbreeding analysis showing the observed number of homozygotes [O(HOM)], expected number of homozygotes [E(HOM)], number of non-missing genotypes [N(NM)] and the inbreeding coefficient estimate (F).

**Table S6. Total number of Copy Number Variants (CNVs) in Mapuche-Huilliche genomes.**

|            | <b>Total CNV</b> | <b>Gain (Novel)</b> | <b>Loss (Novel)</b> |
|------------|------------------|---------------------|---------------------|
| G000011194 | 253 (139)        | 95 (73)             | 158 (66)            |
| G000011195 | 257 (142)        | 91 (77)             | 166 (65)            |
| G000011196 | 270 (156)        | 108 (92)            | 162 (64)            |
| G000011198 | 282 (162)        | 112 (91)            | 170 (71)            |
| G000011200 | 266 (164)        | 110 (93)            | 156 (71)            |
| G000011201 | 274 (165)        | 110 (92)            | 164 (73)            |
| G000011210 | ND               | ND                  | ND                  |
| G000011215 | 260 (143)        | 83 (67)             | 177 (76)            |
| G000011242 | ND               | ND                  | ND                  |
| G000020403 | 248 (136)        | 84 (68)             | 164 (68)            |
| G000020711 | ND               | ND                  | ND                  |
| Total      | 680 (398)        | 390 (244)           | 290 (154)           |

ND: not determined

**Table S7. Total number of Structural Variants (SVs) in Mapuche-Huilliche genomes.**

| <b>Assembly ID</b> | <b>Total SV<br/>(Novel)</b> | <b>Deletions<br/>(Novel)</b> | <b>Distal<br/>Duplication<br/>(Novel)</b> | <b>Tandem<br/>Duplication<br/>(Novel)</b> | <b>Inversions<br/>(Novel)</b> | <b>Translocations<br/>(Novel)</b> |
|--------------------|-----------------------------|------------------------------|-------------------------------------------|-------------------------------------------|-------------------------------|-----------------------------------|
| G000011194         | 1,312(506)                  | 1,164(387)                   | 47(47)                                    | 93(68)                                    | 6(4)                          | 2                                 |
| G000011195         | 1,281(492)                  | 1,156(387)                   | 45(45)                                    | 76(57)                                    | 4(3)                          | 0                                 |
| G000011196         | 1,261(506)                  | 1,127(387)                   | 44(44)                                    | 85(71)                                    | 5(4)                          | 0                                 |
| G000011198         | 1,197(460)                  | 1,066(348)                   | 42(42)                                    | 81(65)                                    | 8(5)                          | 0                                 |
| G000011200         | 1,187(455)                  | 1,059(348)                   | 40(40)                                    | 83(63)                                    | 5(4)                          | 0                                 |
| G000011201         | 1,221(479)                  | 1,087(371)                   | 43(42)                                    | 84(61)                                    | 6(5)                          | 1                                 |
| G000011210         | ND                          | ND                           | ND                                        | ND                                        | ND                            | ND                                |
| G000011215         | 1,331(552)                  | 1,193(432)                   | 43(43)                                    | 90(75)                                    | 5(2)                          | 0                                 |
| G000011242         | ND                          | ND                           | ND                                        | ND                                        | ND                            | ND                                |
| G000020403         | 1,293(536)                  | 1,186(449)                   | 41(41)                                    | 59(41)                                    | 6(4)                          | 1 (1)                             |
| G000020711         | ND                          | ND                           | ND                                        | ND                                        | ND                            | ND                                |
| Total (Union)      | 4,514 (1,910)               | 3,868(1362)                  | 202(201)                                  | 412(329)                                  | 28(18)                        | 4(1)                              |

ND: not determined
